# Supplementary material for: Resistance to Neuromuscular Blockade by Rocuronium in Surgical Patients with Spastic Cerebral Palsy
Source: MDPI journal article supplement (doi:10.3390/jpm11080765), 2021-08-03
Supplement: s1 [file s1]

Supplementary Video Link:

<https://drive.google.com/drive/folders/1twnUt1j3gxLkIuY7cOuG1lqUM4xJUoHh?usp=sharing>
